# Supplementary material for: Cholecalciferol Supplementation Induced Up-Regulation of SARAF Gene and Down-Regulated miR-155-5p Expression in Slovenian Patients with Multiple Sclerosis
Source: Genes (Basel). 2023 Jun 8;14(6):1237. doi: 10.3390/genes14061237 (PMC10297972; doi:10.3390/genes14061237)
Supplement: Supplementary file 1 [file genes-14-01237-s001.zip › Supp/Table_S1.xlsx]

## Sheet: Sheet1
mirnaid	refseqid	genesymbol	start	end	bindingp	number_of_pairings	binding_region_length	position	validated	TargetScan	miRDB	chr	NC.start	NC.end
hsa-miR-155-5p	NM_181865	ACOT7	460	472	1	11	12	CDS	MIRT020748	0	0	1	6393577	6393589
hsa-miR-155-5p	NM_016824	ADD3	2196	2240	1	17	26	CDS	MIRT125863	0	1	10	111893106	111893150
hsa-miR-155-5p	NM_001368954	ALDH5A1	2440	2461	1	17	21	3UTR	MIRT020822	0	0	6	24534888	24534909
hsa-miR-155-5p	NM_181847	AMIGO2	1718	1741	1	20	23	CDS	MIRT001573	0	0	12	47471598	47471621
hsa-miR-155-5p	NM_019087	ARL15	747	762	1	14	15	3UTR	MIRT020858	0	1	5	53182338	53182353
hsa-miR-155-5p	NM_030925	CAB39L	1465	1488	1	19	23	3UTR	MIRT020525	0	0	13	49884917	49884940
hsa-miR-155-5p	NM_001378136	CARS1	2547	2566	1	17	19	3UTR	MIRT020880	0	0	11	3022252	3022271
hsa-miR-155-5p	NM_006431	CCT2	1660	1677	1	16	17	CDS	MIRT021019	0	1	12	69995094	69995111
hsa-miR-155-5p	NM_004935	CDK5	757	772	1	13	15	CDS	MIRT020734	0	0	7	150751368	150751383
hsa-miR-155-5p	NM_001308319	CHD9	10468	10486	1	16	18	3UTR	MIRT020560	1	1	16	53360330	53360348
hsa-miR-155-5p	NM_015607	CHTOP	479	504	1	20	25	CDS	MIRT020760	0	0	1	153610889	153610914
hsa-miR-155-5p	NM_014756	CKAP5	6515	6538	1	21	23	3UTR	MIRT006116	1	1	11	46765052	46765075
hsa-miR-155-5p	NM_032359	CMSS1	1629	1673	1	17	24	3UTR	MIRT020861	0	0	3	99897903	99897947
hsa-miR-155-5p	NM_001308189	CPEB4	3583	3615	1	18	21	3UTR	MIRT440899	1	0	5	173383199	173383231
hsa-miR-155-5p	NM_001168393	CREBRF	112	132	1	15	20	5UTR	MIRT005103	1	1	5	172483466	172483486
hsa-miR-155-5p	NM_001256135	CSE1L	2476	2493	1	16	17	CDS	MIRT020837	0	0	20	47710750	47710767
hsa-miR-155-5p	NM_001144074	DET1	1523	1543	1	16	20	CDS	MIRT000972	1	1	15	89060085	89060105
hsa-miR-155-5p	NM_014762	DHCR24	3654	3677	1	19	23	3UTR	MIRT020936	0	0	1	55315856	55315879
hsa-miR-155-5p	NM_006145	DNAJB1	273	293	1	17	20	CDS	MIRT001553	1	1	19	14627825	14627845
hsa-miR-155-5p	NM_201284	EGFR	2781	2801	1	16	20	3UTR	MIRT020911	0	0	7	55238639	55238659
hsa-miR-155-5p	NM_000130	F5	1416	1431	1	14	15	CDS	MIRT020806	0	0	1	169519938	169519953
hsa-miR-155-5p	NM_052905	FMNL2	1218	1244	1	19	26	CDS	MIRT001547	0	1	2	153437475	153437501
hsa-miR-155-5p	NM_194247	HNRNPA3	2376	2397	1	18	21	3UTR	MIRT020978	1	1	2	178085353	178085374
hsa-miR-155-5p	NM_015443	KANSL1	4936	4956	1	17	20	3UTR	MIRT493447	1	1	17	44107900	44107920
hsa-miR-155-5p	NM_014875	KIF14	292	339	1	17	23	5UTR	MIRT021036	0	0	1	200589541	200589588
hsa-miR-155-5p	NM_015990	KLHL5	876	898	1	17	22	CDS	MIRT020925	0	1	4	39077656	39077678
hsa-miR-155-5p	NM_001305009	LNPK	889	912	1	16	23	CDS	MIRT020548	0	1	2	176812250	176812273
hsa-miR-155-5p	NM_001320808	LPGAT1	3151	3172	1	18	21	3UTR	MIRT020554	0	1	1	211922098	211922119
hsa-miR-155-5p	NM_017768	LRRC40	1864	1883	1	17	19	3UTR	MIRT020510	1	0	1	70611448	70611467
hsa-miR-155-5p	NM_013255	MKLN1	2879	2919	1	18	24	3UTR	MIRT440237	0	0	7	131173134	131173174
hsa-miR-155-5p	NM_001258273	MLH1	1143	1162	1	16	19	CDS	MIRT000461	0	0	3	37067293	37067312
hsa-miR-155-5p	NM_053027	MYLK	6467	6500	1	18	25	3UTR	MIRT020526	1	0	3	123332356	123332389
hsa-miR-155-5p	NM_022346	NCAPG	1511	1536	1	22	25	CDS	MIRT020693	0	0	4	17826619	17826644
hsa-miR-155-5p	NM_000176	NR3C1	3228	3253	1	18	25	3UTR	MIRT020725	0	0	5	142661024	142661049
hsa-miR-155-5p	NM_023034	NSD3	10319	10349	1	23	30	3UTR	MIRT021058	0	0	8	38127641	38127671
hsa-miR-155-5p	NM_138381	OXNAD1	1439	1461	1	16	22	3UTR	MIRT020942	0	0	3	16345117	16345139
hsa-miR-155-5p	NM_032632	PAPOLA	281	299	1	16	18	CDS	MIRT005093	0	1	14	96986453	96986471
hsa-miR-155-5p	NM_181042	PBRM1	4745	4762	1	14	17	CDS	MIRT020793	0	0	3	52584570	52584587
hsa-miR-155-5p	NM_001352606	PCCA	1683	1708	1	21	25	CDS	MIRT445554	0	0	13	101077939	101077964
hsa-miR-155-5p	NM_016297	PCYOX1	679	697	1	16	18	CDS	MIRT020500	0	0	2	70502247	70502265
hsa-miR-155-5p	NM_001011515	PDLIM5	716	736	1	16	20	CDS	MIRT001527	0	1	4	95508148	95508168
hsa-miR-155-5p	NM_014660	PHF14	308	326	1	16	18	5UTR	MIRT020981	0	0	7	11013806	11013824
hsa-miR-155-5p	NM_181504	PIK3R1	3004	3021	1	16	17	3UTR	MIRT053013	1	0	5	67595003	67595020
hsa-miR-155-5p	NM_181839	PKIA	569	586	1	16	17	3UTR	MIRT006214	1	0	8	79514238	79514255
hsa-miR-155-5p	NM_001276289	PRKAR1A	1284	1305	1	17	21	CDS	MIRT020712	1	0	17	66526470	66526491
hsa-miR-155-5p	NM_001286808	PRRC1	660	679	1	16	19	CDS	MIRT555203	0	0	5	126862319	126862338
hsa-miR-155-5p	NM_014614	PSME4	1654	1677	1	20	23	CDS	MIRT020902	0	0	2	54155289	54155312
hsa-miR-155-5p	NM_001099666	PTAR1	3839	3855	1	15	16	3UTR	MIRT439881	1	0	9	72330685	72330701
hsa-miR-155-5p	NM_001286059	RAB30	5378	5397	1	17	19	3UTR	MIRT020831	1	0	11	82688533	82688552
hsa-miR-155-5p	NM_002867	RAB3B	3441	3479	1	18	26	3UTR	MIRT053437	1	1	1	52382929	52382967
hsa-miR-155-5p	NM_133487	RAD51	314	340	1	15	20	CDS	MIRT054639	0	0	15	40991016	40991042
hsa-miR-155-5p	NM_001297671	RGL1	4245	4264	1	17	19	3UTR	MIRT439774	0	0	1	183897186	183897205
hsa-miR-155-5p	NM_018151	RIF1	10450	10474	1	20	24	3UTR	MIRT020847	0	0	2	152334474	152334498
hsa-miR-155-5p	NM_134260	RORA	9478	9505	1	21	27	3UTR	MIRT546707	1	1	15	60781976	60782003
hsa-miR-155-5p	NM_001129993	SANBR	1827	1851	1	18	24	CDS	MIRT444908	0	0	2	61333710	61333734
hsa-miR-155-5p	NM_001284239	SARAF	1003	1020	1	15	17	CDS	MIRT440622	0	1	8	29923558	29923575
hsa-miR-155-5p	NM_133266	SHANK2	5025	5045	1	15	20	3UTR	MIRT053009	1	0	11	70317789	70317809
hsa-miR-155-5p	NM_001314049	SIRT1	2928	2948	1	18	20	3UTR	MIRT439628	1	0	10	69677698	69677718
hsa-miR-155-5p	NM_001135153	SLC39A14	4198	4221	1	18	23	3UTR	MIRT020522	0	0	8	22279715	22279738
hsa-miR-155-5p	NM_005901	SMAD2	11297	11330	1	19	24	3UTR	MIRT005872	1	1	18	45358624	45358657
hsa-miR-155-5p	NM_001374457	SMARCA4	3315	3335	1	15	20	CDS	MIRT020993	1	1	19	11136158	11136178
hsa-miR-155-5p	NM_138473	SP1	6030	6051	1	18	21	3UTR	MIRT135364	0	1	12	53808580	53808601
hsa-miR-155-5p	NM_003164	STX5	1670	1687	1	16	17	3UTR	MIRT021024	0	0	11	62574439	62574456
hsa-miR-155-5p	NM_001286805	TBC1D14	819	840	1	15	19	CDS	MIRT020787	0	0	4	7012466	7012487
hsa-miR-155-5p	NM_001306207	TCF4	1366	1386	1	14	20	CDS	MIRT439480	1	1	18	52924543	52924563
hsa-miR-155-5p	NM_001301025	TJP1	7316	7336	1	17	20	3UTR	MIRT020884	0	0	15	29992259	29992279
hsa-miR-155-5p	NM_012210	TRIM32	2780	2803	1	21	23	3UTR	MIRT001492	1	1	9	119462643	119462666
hsa-miR-155-5p	NM_001282902	TRPS1	2767	2810	1	17	20	CDS	MIRT437646	1	1	8	116599221	116599264
hsa-miR-155-5p	NM_030927	TSPAN14	1575	1599	1	21	24	3UTR	MIRT020709	1	1	10	82278415	82278439
hsa-miR-155-5p	NM_015913	TXNDC12	623	651	1	19	28	3UTR	MIRT001490	0	0	1	52486568	52486596
